# Supplementary material for: Development of an optode based on 2-amino-4-(4-nitrophenyl)diazenyl pyridine-3-ol and tri-n-octyl phosphine oxide for trace-level lead detection in complex samples
Source: Royal Society of Chemistry journal article supplement (doi:10.1039/d4ra08828j), 2025-01-01
Supplement: d4ra08828j1.pdf [file d4ra08828j1.pdf]

**Table S1** Comparison of the proposed optode with the reported Pb<sup>2+</sup> optical and potentiometric sensors.

| Reagent                                                                     | Method                | Response time | Measuring range (M)                            | Detection limit (M)         | Ref.      |
|-----------------------------------------------------------------------------|-----------------------|---------------|------------------------------------------------|-----------------------------|-----------|
| $\alpha$ -Nitroso- $\beta$ -naphthol sorbed zirconium(IV) tungsto phosphate | Potentiometric sensor | 40 sec        | $1.0 \times 10^{-6}$ –<br>$5.0 \times 10^{-5}$ | $1.0 \times 10^{-5}$        | [51]      |
| Capric acid                                                                 | Potentiometric sensor | 15 sec        | $1.0 \times 10^{-5}$ –<br>$1.0 \times 10^{-2}$ | $6.0 \times 10^{-6}$        | [52]      |
| Dimethyl benzotetrathia fulvalene                                           | Potentiometric sensor | 20 sec        | $1.0 \times 10^{-5}$ –<br>$1.0 \times 10^{-2}$ | $8.0 \times 10^{-6}$        | [53]      |
| Cetylpyridinium chloride                                                    | Potentiometric sensor | 20 sec        | $7.9 \times 10^{-7}$ –<br>$1.0 \times 10^{-4}$ | $4.8 \times 10^{-7}$        | [54]      |
| 3,3,5,5-Tetramethyl-N-9-anthrylmethyl) benzidine                            | Optode (Fluorescence) | 2.0–10 min    | $2.0 \times 10^{-7}$ –<br>$2.0 \times 10^{-3}$ | $2.0 \times 10^{-7}$        | [55]      |
| 5,10,15,20-Tetra-(3-bromo-4-hydroxyphenyl)porphyrin                         | Optode (Fluorescence) | 4.0 min       | $5.0 \times 10^{-6}$ –<br>$5.0 \times 10^{-4}$ | $2.0 \times 10^{-8}$        | [56]      |
| Dioxaoctanediamide                                                          | Optode (Absorption)   | 20–200 min    | $5.0 \times 10^{-7}$ –<br>$5.0 \times 10^{-1}$ | $3.2 \times 10^{-10}$       | [57]      |
| (1,10-Dibenzyl-1, 10-diaza-18-crown-6                                       | Optode (Absorption)   | 20 min        | $1.0 \times 10^{-8}$ –<br>$5.0 \times 10^{-5}$ | $1.0 \times 10^{-8}$        | [58]      |
| 4-(thiazol-2-yl diazenyl)benzene-1,3-diol                                   | Optode (Absorption)   | 5.0 min       | $6.0 \times 10^{-9}$ –<br>$8.0 \times 10^{-5}$ | $1.75 \times 10^{-9}$       | [42]      |
| 5-(2'-bromophenylazo)-6-hydroxy-pyrimidine-2,4-dione                        | Optode (Absorption)   | 5.0 min       | 4.00–144<br>ng mL <sup>-1</sup>                | 1.20<br>ng mL <sup>-1</sup> | [59]      |
| Gallocynine                                                                 | Optode (Reflectance)  | 5.0 min       | $4.8 \times 10^{-7}$ –<br>$4.8 \times 10^{-3}$ | $2.9 \times 10^{-7}$        | [60]      |
| 2-amino-4-(4-nitrophenyl) diazenyl) pyridine-3-ol                           | Optode (Absorption)   | 5.0 min       | 6.0–160<br>ng mL <sup>-1</sup>                 | 1.80<br>ng mL <sup>-1</sup> | This work |

**Table S2** Ultra trace detection of Pb<sup>2+</sup> and Pb<sup>4+</sup> speciation in mixtures

| Serial no.                                                                                                                 | Pb <sup>2+</sup> -Pb <sup>4+</sup> | Pb taken (ng mL <sup>-1</sup> ) |                  | Pb found (ng mL <sup>-1</sup> ) |                  | Error (ng mL <sup>-1</sup> ) |                  |
|----------------------------------------------------------------------------------------------------------------------------|------------------------------------|---------------------------------|------------------|---------------------------------|------------------|------------------------------|------------------|
|                                                                                                                            |                                    | Pb <sup>2+</sup>                | Pb <sup>4+</sup> | Pb <sup>2+</sup>                | Pb <sup>4+</sup> | Pb <sup>2+</sup>             | Pb <sup>4+</sup> |
| 1                                                                                                                          | 1:1                                | 50                              | 50               | 49.8                            | 50.3             | 0.2                          | 0.3              |
| 2                                                                                                                          | 1:1                                | 50                              | 50               | 50.5                            | 49.5             | 0.5                          | 0.5              |
| 3                                                                                                                          | 1:1                                | 50                              | 50               | 50.4                            | 49.7             | 0.4                          | 0.3              |
| Mean error: Pb <sup>2+</sup> = ± 0.5, Pb <sup>4+</sup> = ± 0.5; SD: Pb <sup>2+</sup> = ± 0.004, Pb <sup>4+</sup> = ± 0.003 |                                    |                                 |                  |                                 |                  |                              |                  |
| 1                                                                                                                          | 1:5                                | 20                              | 100              | 19.8                            | 100.2            | 0.2                          | 0.2              |
| 2                                                                                                                          | 1:5                                | 20                              | 100              | 20.1                            | 99.7             | 0.1                          | 0.3              |
| 3                                                                                                                          | 1:5                                | 20                              | 100              | 20.2                            | 100.4            | 0.2                          | 0.4              |
| Mean error: Pb <sup>2+</sup> = ± 0.2, Pb <sup>4+</sup> = ± 0.4; SD: Pb <sup>2+</sup> = ± 0.003; Pb <sup>4+</sup> = ± 0.005 |                                    |                                 |                  |                                 |                  |                              |                  |
| 1                                                                                                                          | 1:10                               | 12                              | 120              | 12.4                            | 124.8            | 0.4                          | 0.2              |
| 2                                                                                                                          | 1:10                               | 12                              | 120              | 11.6                            | 125.1            | 0.4                          | 0.1              |
| 3                                                                                                                          | 1:10                               | 12                              | 120              | 11.7                            | 124.9            | 0.3                          | 0.1              |
| Mean error: Pb <sup>2+</sup> = ± 0.4; Pb <sup>4+</sup> = ± 0.4 SD: Pb <sup>2+</sup> = ± 0.006; Pb <sup>4+</sup> = ± 0.005  |                                    |                                 |                  |                                 |                  |                              |                  |

**Table S3** Ultra-trace levels of lead in various surface soil samples

| Serial no.                  | Lead ( $\mu\text{g g}^{-1}$ ) <sup>a</sup> |                   | Sample source                               |
|-----------------------------|--------------------------------------------|-------------------|---------------------------------------------|
|                             | Proposed optode                            | ICP-AES           |                                             |
| S                           | $68.50 \pm 1.5^b$                          | $69.00 \pm 1.5^b$ | Roadside soil (Benha–Cairo highway)         |
| S <sub>4</sub>              | $75.00 \pm 2.0$                            | $75.50 \pm 2.0$   | Industrial soil (Catron Company, Benha)     |
| S <sub>2</sub>              | $9.50 \pm 1.5$                             | $9.50 \pm 1.5$    | Agricultural soil (Benha University campus) |
| S <sub>6</sub>              | $5.80 \pm 1.6$                             | $6.00 \pm 1.6$    | Marine soil (Bay of Benha)                  |
| S <sub>1</sub> <sup>c</sup> | $170.0 \pm 1.2$                            | $171.0 \pm 1.2$   | Traffic soil (Benha bus terminal, Benha)    |
| S <sub>3</sub>              | $105.5 \pm 1.8$                            | $105.0 \pm 1.8$   | Paint soil (Shoubra Paint, Qhalubia)        |

<sup>a</sup> Average of six analyses of each sample.

<sup>b</sup> The measure of precision is the standard deviation.

<sup>c</sup> Composition of the soil samples: C, N, P, K, Na, Ca, Mg, Cu, Fe, Pb, NO<sub>3</sub>, NO<sub>2</sub>, Zn, SO<sub>4</sub>, Mn, Mo, Co, etc.

**Table S4** Analysis of gasoline samples (n = 6).

| Samples        | Pb spike (ng mL <sup>-1</sup><br>Pb in the form<br>of Pb(C <sub>2</sub> H <sub>5</sub> ) <sub>4</sub> ) | Found <sup>d</sup> |           | Recovery (%) | t-test <sup>e</sup> | F-value <sup>f</sup> |
|----------------|---------------------------------------------------------------------------------------------------------|--------------------|-----------|--------------|---------------------|----------------------|
|                |                                                                                                         | Optode             | ICP-AES   |              |                     |                      |
| Gasoline       | 0                                                                                                       | 13.0±0.1           | 12.7±1.2  |              |                     |                      |
| A <sup>a</sup> | 15                                                                                                      | 28.4±0.3           | 26.9±1.4  | 101.52       | 1.87                | 3.65                 |
|                | 30                                                                                                      | 43.6±0.4           | 42.0±1.5  | 98.36        | 1.56                | 3.48                 |
|                | 45                                                                                                      | 72.5±0.2           | 73.4±1.1  | 100.96       | 1.96                | 4.21                 |
| Gasoline       | 0                                                                                                       | 11.5±0.3           | 11.8±1.5  |              |                     |                      |
| B <sup>b</sup> | 20                                                                                                      | 31.0±0.2           | 32.3±1.2  | 101.12       | 1.23                | 2.97                 |
|                | 40                                                                                                      | 52.0±0.5           | 51.3±1.6  | 99.52        | 1.55                | 3.39                 |
|                | 60                                                                                                      | 70.7±0.4           | 73.5±1.5  | 99.47        | 1.42                | 3.25                 |
| Gasoline       | 0.0                                                                                                     | 13.5±0.2           | 13.4±1.7  |              |                     |                      |
| C <sup>c</sup> | 30                                                                                                      | 44.4±0.4           | 42.8±1.4  | 99.74        | 1.64                | 3.57                 |
|                | 60                                                                                                      | 63.2±0.3           | 64.7±1.7  | 100.63       | 1.70                | 3.86                 |
|                | 90                                                                                                      | 105.0±0.5          | 102.2±1.6 | 99.32        | 1.31                | 3.12                 |

<sup>a,b,c</sup>: Gasoline samples collected from different gas station of the Port Said, Benha, and El-Mahdena cities of Egypt, KAS.

<sup>d</sup> Average of six analyses of each sample.

<sup>e</sup> Tabulated t-value for five degrees of freedom at P (0.95) is 2.57

<sup>f</sup> Tabulated F-value at P (0.95) is 5.05.
